# Supplementary material for: Endothelin B receptor inhibition rescues aging-dependent neuronal regenerative decline
Source: bioRxiv preprint, doi:10.1101/2024.06.08.597928, version 3 (2025-06-09)
Supplement: Supp Data 1 [file 597928_file04.xlsx]

## Sheet: FIBRO
Gene

## Sheet: MAC
Gene

## Sheet: MURAL
Gene

## Sheet: MSC
Gene

## Sheet: NMSC
Gene

## Sheet: NEU
Gene

## Sheet: SGC
Gene

## Sheet: VEC
Gene
